# Supplementary material for: The effects of shoe structural features on agility and stability tasks during walking
Source: PeerJ. 2025 Sep 11;13:e19930. doi: 10.7717/peerj.19930 (PMC12433620; doi:10.7717/peerj.19930)
Supplement: Supplemental Information 3 — Primary outcome measurements from agility trials (n = 14) were average cycle completion speed (m/s), length along the major longitudinal axis (m), width along the minor transverse axis (m), and steps per cycle. Primary outcome measurements from stability trials (n = 12) were step width (m), step length (m), and margin of stability (MoS) both in the anteroposterior (MoSAP, cm) and the mediolateral (MoSML, cm) directions. Each data point indicates the average value per subject. [file peerj-13-19930-s003.xlsx]

## Sheet: Sheet1
	AGILITY TASK METRICS (Figure-8 Walking)
		AGILITY SHOE
			Step count
			Subject 1	Subject 2	Subject 3	Subject 4	Subject 5	Subject 6	Subject 7	Subject 8	Subject 9	Subject 10	Subject 11	Subject 12	Subject 13	Subject 14
			14.8	13	15.8	16.2	12.6	14.2	12.6	18.8	14.8	10	13.6	17	17.8	16.4
			Walking speed (m/s)
			Subject 1	Subject 2	Subject 3	Subject 4	Subject 5	Subject 6	Subject 7	Subject 8	Subject 9	Subject 10	Subject 11	Subject 12	Subject 13	Subject 14
			0.63	0.66	0.89	0.82	0.7	0.89	0.9	0.76	0.83	0.82	0.72	0.77	0.75	0.94
			Length along the major longitudinal axis of the figure-8 (m)
			Subject 1	Subject 2	Subject 3	Subject 4	Subject 5	Subject 6	Subject 7	Subject 8	Subject 9	Subject 10	Subject 11	Subject 12	Subject 13	Subject 14
			2.18	2.04	2.65	2.73	2.17	2.77	2.3	2.49	2.66	1.89	2.34	2.76	3.11	2.97
			Width along the minor transverse axis of the figure-8 (m)
			Subject 1	Subject 2	Subject 3	Subject 4	Subject 5	Subject 6	Subject 7	Subject 8	Subject 9	Subject 10	Subject 11	Subject 12	Subject 13	Subject 14
			0.93	0.94	1.14	1.2	1.05	1.22	0.9	1.01	1.1	0.72	1.11	1.31	1.56	1.44
		STABILITY SHOE
			Step count
			Subject 1	Subject 2	Subject 3	Subject 4	Subject 5	Subject 6	Subject 7	Subject 8	Subject 9	Subject 10	Subject 11	Subject 12	Subject 13	Subject 14
			15.6	14.8	15.6	17.2	13.2	14.2	13.6	17.6	15.8	10	13.4	15.8	17.2	16.2
			Walking speed (m/s)
			Subject 1	Subject 2	Subject 3	Subject 4	Subject 5	Subject 6	Subject 7	Subject 8	Subject 9	Subject 10	Subject 11	Subject 12	Subject 13	Subject 14
			0.66	0.7	0.89	0.81	0.75	0.85	0.85	0.72	0.78	0.83	0.71	0.75	0.72	0.92
			Length along the major longitudinal axis of the figure-8 (m)
			Subject 1	Subject 2	Subject 3	Subject 4	Subject 5	Subject 6	Subject 7	Subject 8	Subject 9	Subject 10	Subject 11	Subject 12	Subject 13	Subject 14
			2.2	2.25	2.81	2.9	2.22	2.74	2.43	2.45	2.52	1.98	2.21	2.51	3.14	3.03
			Width along the minor transverse axis of the figure-8 (m)
			Subject 1	Subject 2	Subject 3	Subject 4	Subject 5	Subject 6	Subject 7	Subject 8	Subject 9	Subject 10	Subject 11	Subject 12	Subject 13	Subject 14
			0.95	1.05	1.3	1.28	1.01	1.2	0.98	0.91	1.1	0.71	1.08	1.13	1.59	1.43
	STABILITY TASK METRICS (Treadmill Walking with Treadmill-Induced Slip Perturbations)
		AGILITY SHOE
			Step width (m)
			Subject 1	Subject 2	Subject 3	Subject 4	Subject 5	Subject 6	Subject 7	Subject 8	Subject 9	Subject 10	Subject 11	Subject 12	Subject 13	Subject 14
			0.16	0.11		0.15	0.19	0.14	0.17		0.13	0.14	0.19	0.21	0.23	0.21
			Step length (m)
			Subject 1	Subject 2	Subject 3	Subject 4	Subject 5	Subject 6	Subject 7	Subject 8	Subject 9	Subject 10	Subject 11	Subject 12	Subject 13	Subject 14
			0.59	0.66		0.67	0.64	0.81	0.73		0.59	0.62	0.78	0.73	0.82	0.61
			Anteroposterior margin of stability (MoS_AP, cm)
			Subject 1	Subject 2	Subject 3	Subject 4	Subject 5	Subject 6	Subject 7	Subject 8	Subject 9	Subject 10	Subject 11	Subject 12	Subject 13	Subject 14
			2.95	-5.24		-3.55	-2.11	-1.51	-16.54		-0.36	18.58	16.36	-2.81	7.28	-18.77
			Mediolateral margin of stability (MoS_ML, cm)
			Subject 1	Subject 2	Subject 3	Subject 4	Subject 5	Subject 6	Subject 7	Subject 8	Subject 9	Subject 10	Subject 11	Subject 12	Subject 13	Subject 14
			13.65	16.08		15.15	18.91	15.68	13.36		12.9	18.69	17.52	15.6	15.55	14.67
		STABILITY SHOE
			Step width (m)
			Subject 1	Subject 2	Subject 3	Subject 4	Subject 5	Subject 6	Subject 7	Subject 8	Subject 9	Subject 10	Subject 11	Subject 12	Subject 13	Subject 14
			0.17	0.12		0.17	0.15	0.15	0.18		0.12	0.15	0.19	0.22	0.26	0.18
			Step length (m)
			Subject 1	Subject 2	Subject 3	Subject 4	Subject 5	Subject 6	Subject 7	Subject 8	Subject 9	Subject 10	Subject 11	Subject 12	Subject 13	Subject 14
			0.53	0.66		0.47	0.47	0.79	0.84		0.4	0.66	0.8	0.71	0.82	0.72
			Anteroposterior margin of stability (MoS_AP, cm)
			Subject 1	Subject 2	Subject 3	Subject 4	Subject 5	Subject 6	Subject 7	Subject 8	Subject 9	Subject 10	Subject 11	Subject 12	Subject 13	Subject 14
			0.17	-9.78		-8.28	-10	5.11	-20.67		-11.48	18.33	18.88	-0.67	2.23	-5.39
			Mediolateral margin of stability (MoS_ML, cm)
			Subject 1	Subject 2	Subject 3	Subject 4	Subject 5	Subject 6	Subject 7	Subject 8	Subject 9	Subject 10	Subject 11	Subject 12	Subject 13	Subject 14
			16.04	14.31		15.09	17.55	17.43	13.95		13.29	18.17	18.25	16.9	14.42	16.67
