# Supplementary material for: The effects of shoe structural features on agility and stability tasks during walking
Source: PeerJ journal article supplement (doi:10.7717/peerj.19930), 2025-09-11
Supplement: Supplemental_Article_S1.pdf [file Supplemental_Article_S1.pdf]

**Participant Puts Shoes On** (similar to a shoe store we have them walk a lap around our room and this is to determine if they need any extra support or inserts)

- ☐ How do the shoes currently feel for size and arch support? (We then discuss the options for inserts to help improve their fit)
- ☐ Do the shoes feel true to your expected size?

**Participant Completes the Figure 8's**

- ☐ Can you share your thoughts with us on how you felt in these shoes during the Figure 8's.
- ☐ Is there anything that stood out to you about these shoes whether positive or negative?
- ☐ How did the support feel during this task?
- ☐ Did you feel like the shoes were comfortable?
- ☐ How did these shoes compare to the other ones that you have worn during the collection today?

**Participant Completes Walking Trials**

- ☐ Now that you are walking in the shoes at different speeds, are there any new thoughts that have come up on these shoes from the first task?
- ☐ Have any of your previous feelings on these shoes differed?
- ☐ Could you discuss with us how the support of the shoe felt during the walking?
- ☐ How was the comfort on these shoes during the walking trial?
- ☐ How do the current pairs of shoes compare to the others that we have worn?

**Participant is Switching Out Shoes for Next Pair** (Let the participant hold on look at the shoe while they are answering this next part because some of them like to point to specific things)

- ☐ As we switch out shoes, are there any last comments or thoughts that you have about the shoes that you were wearing?
