# Supplementary material for: The effects of shoe structural features on agility and stability tasks during walking
Source: PeerJ journal article supplement (doi:10.7717/peerj.19930), 2025-09-11

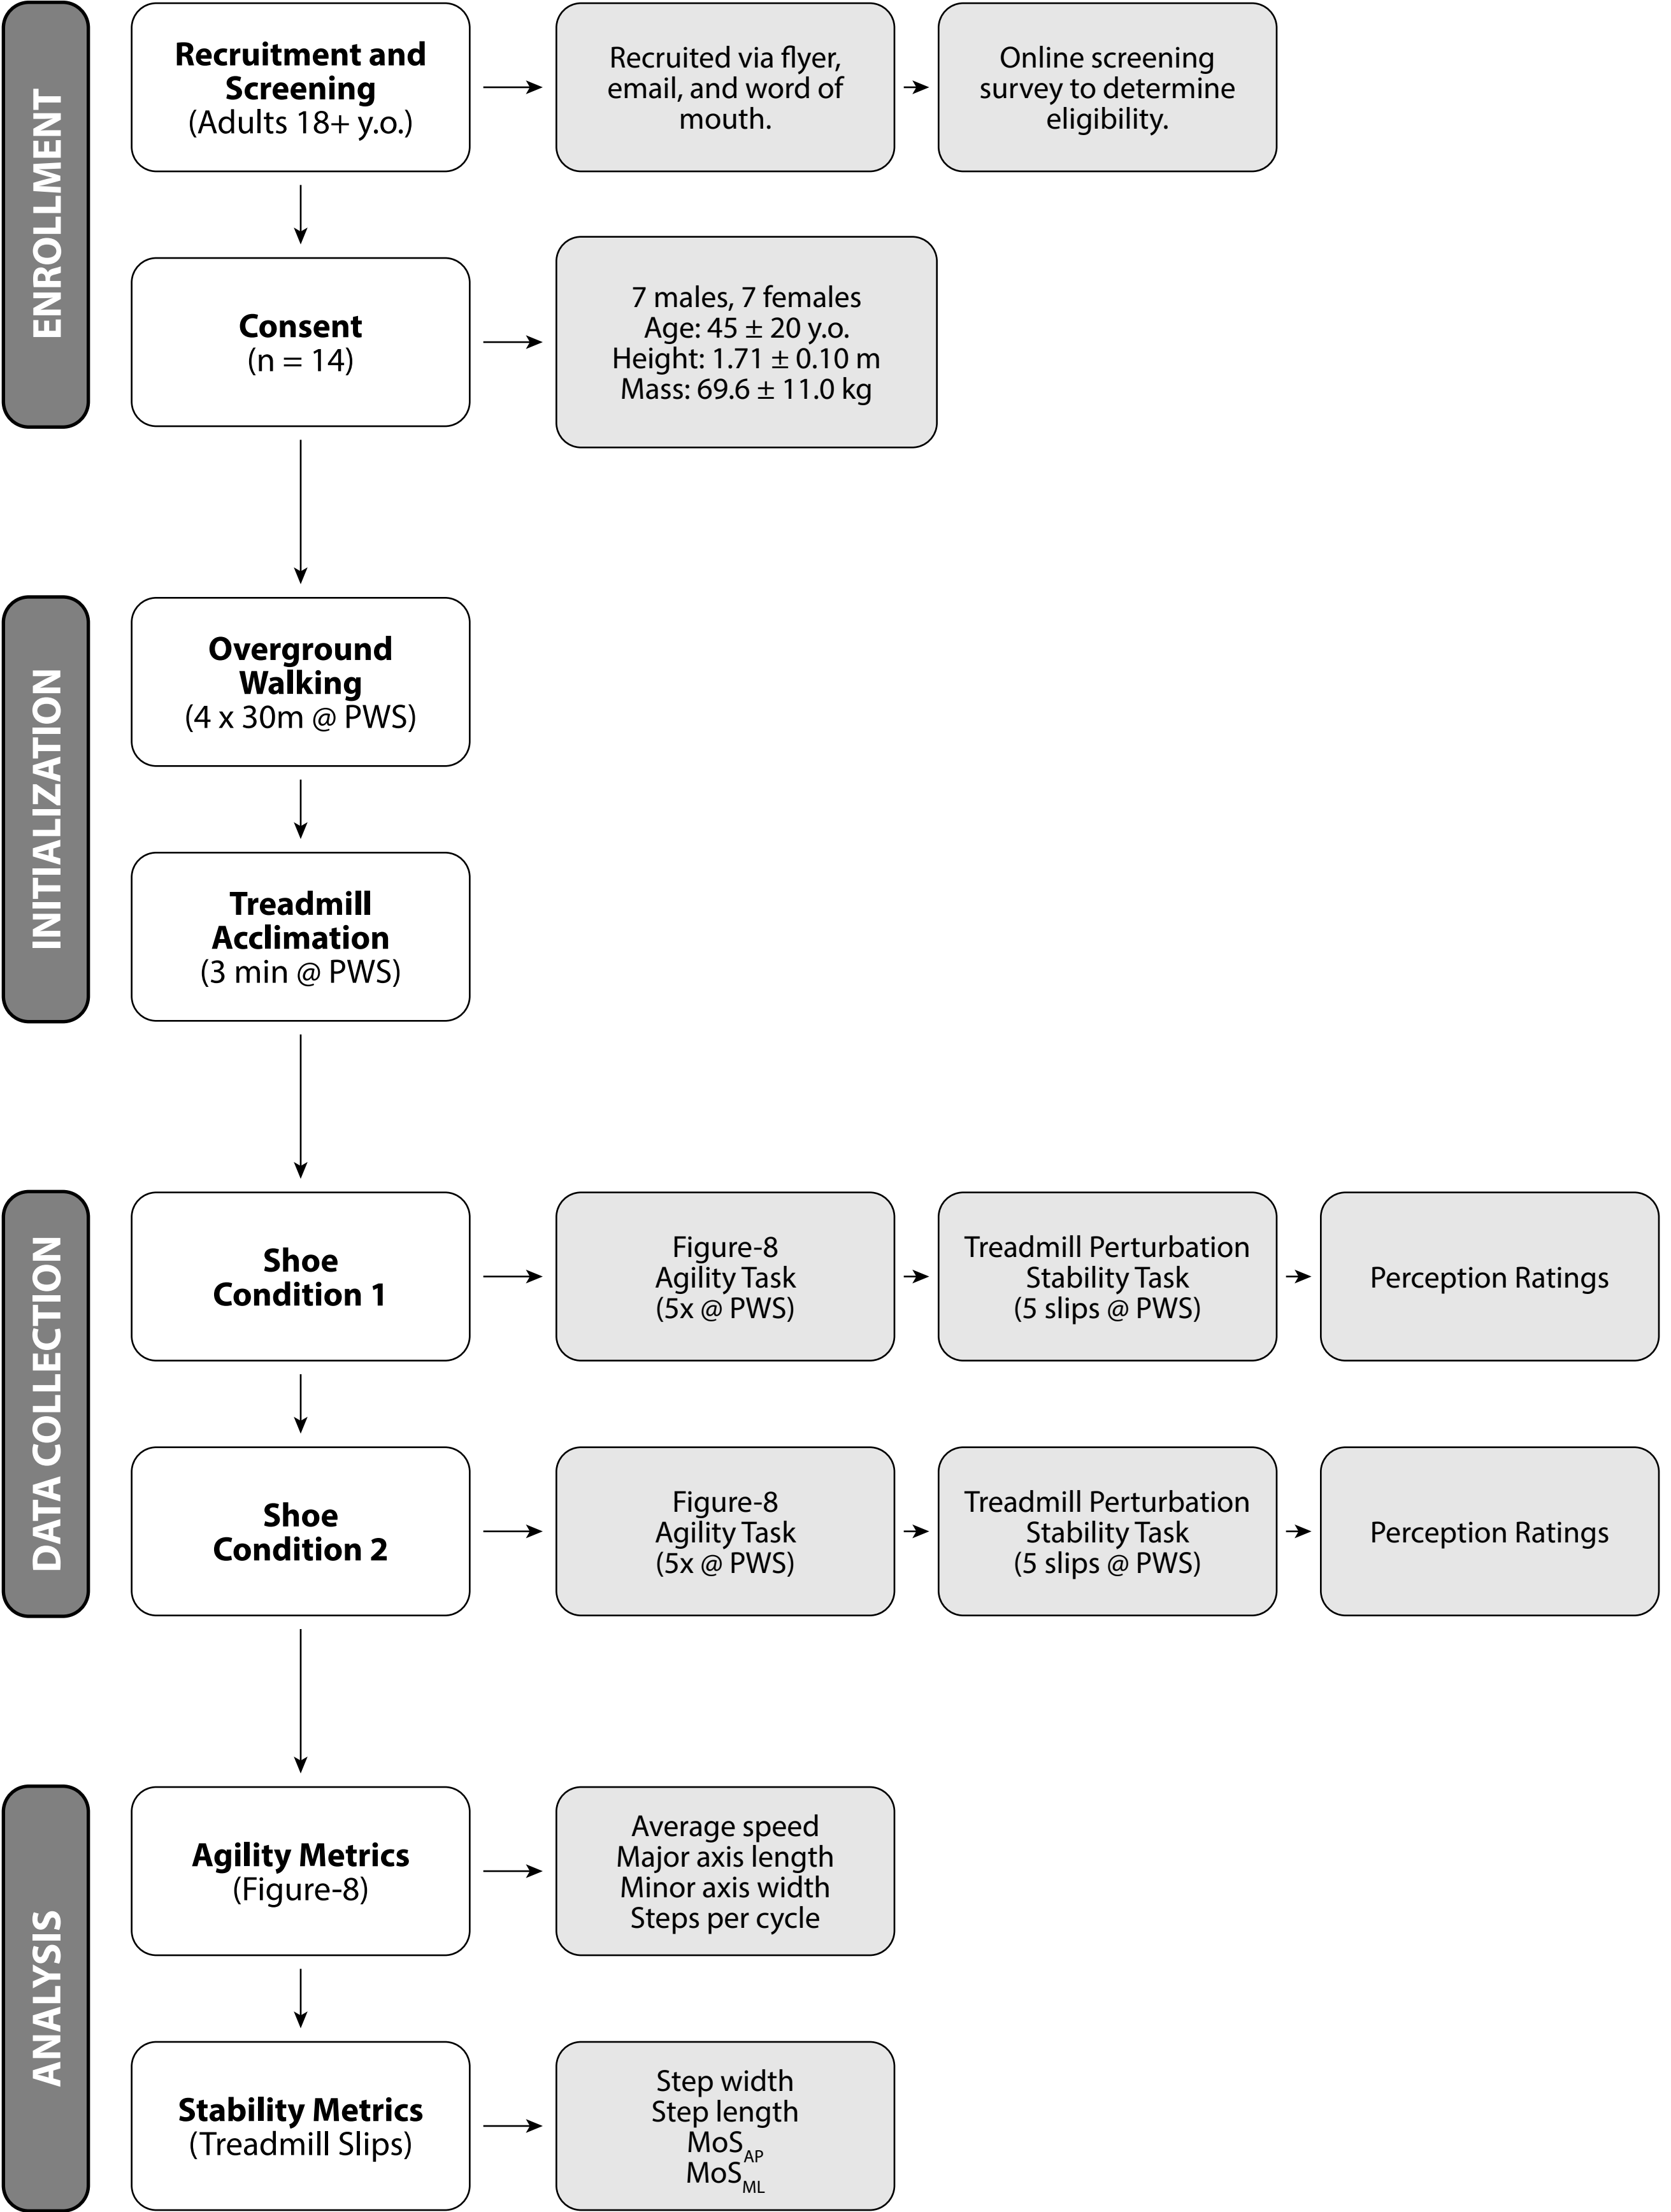

Supplement: Supplemental_Figure_S1.pdf [file Supplemental_Figure_S1.pdf]
